# Supplementary material for: Homologous families of chloride-rich 4,4′-bipyridinium salt structures
Source: Royal Society of Chemistry journal article supplement (doi:10.1039/b009467f), 2001-01-01
Supplement: b009467f.doc [file b009467f.doc]

*Synthesis* of [4,4'-H2bipy][OsCl6] **2**: addition of a colourless solution of 4,4'-bipy (79 mg, 0.506 mmol) in H2O (5 cm3) and aqueous HCl (5 cm3, 33%), to a boiling, dark green solution of K2[OsCl6] (238 mg, 0.495 mmol) in H2O (20 cm3) caused the immediate formation of a dark red microcrystalline precipitate. The precipitate was filtered and the green filtrate was heated to reduce the volume. A second crop of small red crystals suitable for single crystal X-ray diffraction study were grown by slow cooling with simultaneous slow evaporation of the filtrate. Yield 165 mg (58.9%). Microanalytical data (%). Found: C, 21.01; H, 1.76; N, 4.70. Calculated: C, 21.41; H, 1.80; N, 4.99.

*Synthesis* of [4,4'-H2bipy][PtCl6] **3**: addition of a colourless solution of 4,4'-bipy (93 mg, 0.596 mmol) in H2O (10 cm3) and aqueous HCl (5 cm3, 33%), to a boiling, colourless solution of K2[PtCl6] (291 mg, 0.599 mmol) in H2O (20 cm3) and HCl (20cm3, 33%) caused the formation of an orange microcrystalline precipitate. The precipitate was filtered and the filtrate was heated to reduce the volume. A second crop of crystals suitable for single crystal X-ray diffraction study were grown by slow cooling with simultaneous slow evaporation of the filtrate. Yield 276mg (71.5%). Microanalytical data (%). Found: C, 21.17; H, 1.60; N, 4.52. Calc.: C, 21.22; H, 1.78; N, 4.95.

*Synthesis* of [4,4'-H2bipy][FeCl5] **4**: addition of a colourless solution of 4,4'-bipy (316 mg, 2.026 mmol) in HCl (10 cm3, 33%) to a yellow solution of FeCl2 (258 mg, 2.036 mmol) in HCl (10 cm3, 33%) in air. Small yellow–green and red crystals were grown by slow evaporation of the solution. Hand selected red crystals [FeCl5][4,4'-H2bipy] yield 87 mg. Microanalytical data (%). Found: C, 30.09; H, 2.41; N, 6.36. Calc.: C, 30.69; H, 2.58; N, 7.16.

*Synthesis* of [4,4'-H2bipy]Cl2 **1**: addition of a solution of 4,4'-bipy (792 mg, 5.077 mmol) in EtOH (80 cm3) and HCl (15 cm3, 33%) caused the immediate formation of a colourless microcrystalline precipitate. The precipitate was filtered and redissolved in hot H2O. Colourless crystals were grown by slow cooling with simultaneous slow evaporation. Yield 701 mg (87.4%). Microanalytical data (%). Found: C, 51.90; H, 4.32; N, 12.03. Calc.: C, 52.42; H, 4.40; N, 12.23.


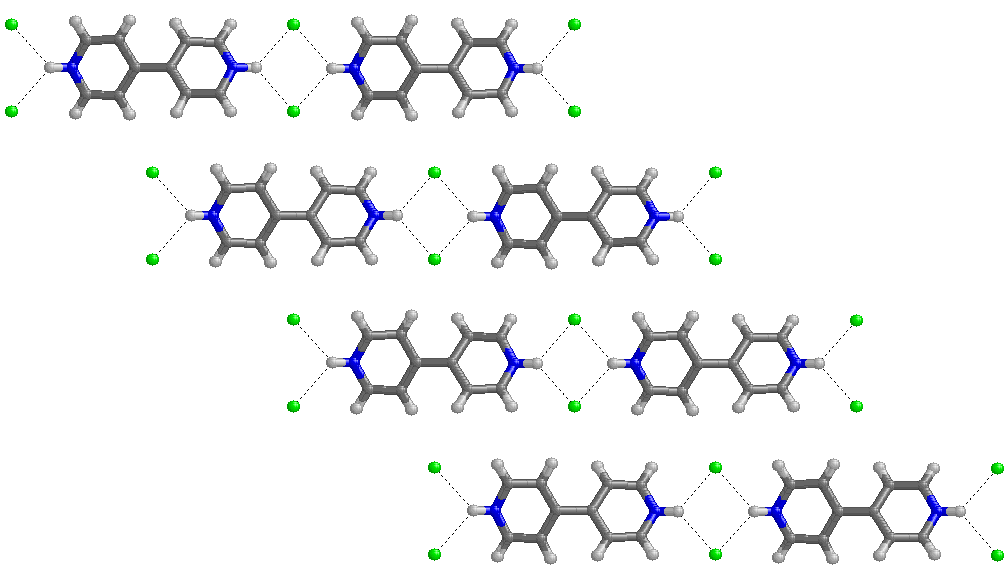


Fig. 1 Hydrogen bonded ribbons of type C in the crystal structure of [4,4'-H2bipy]Cl2 1.


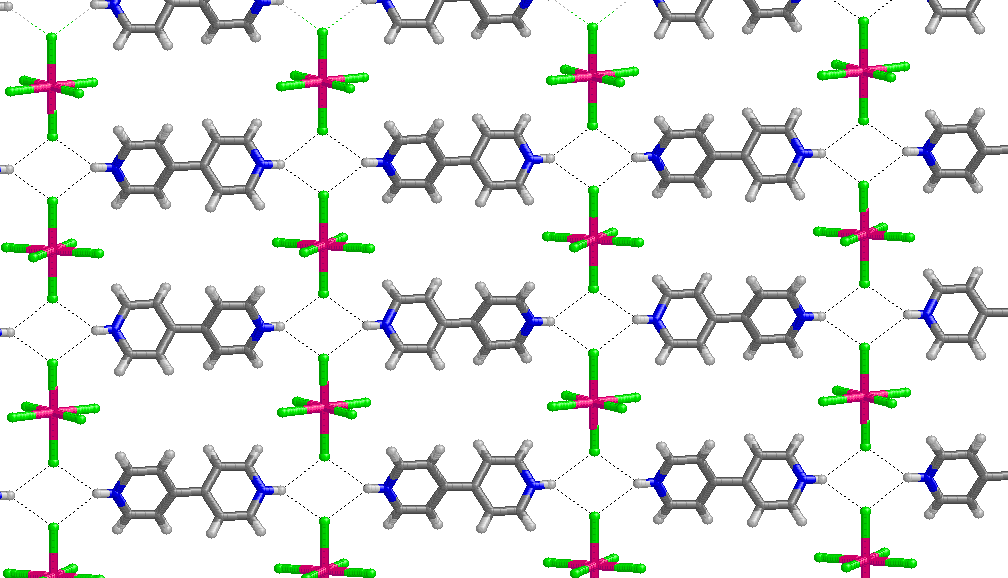


Fig. 2 A hydrogen bonded layer present within the crystal structure of [4,4'-H2bipy][OsCl6] 2. Compound 3 is isostructural with 2.


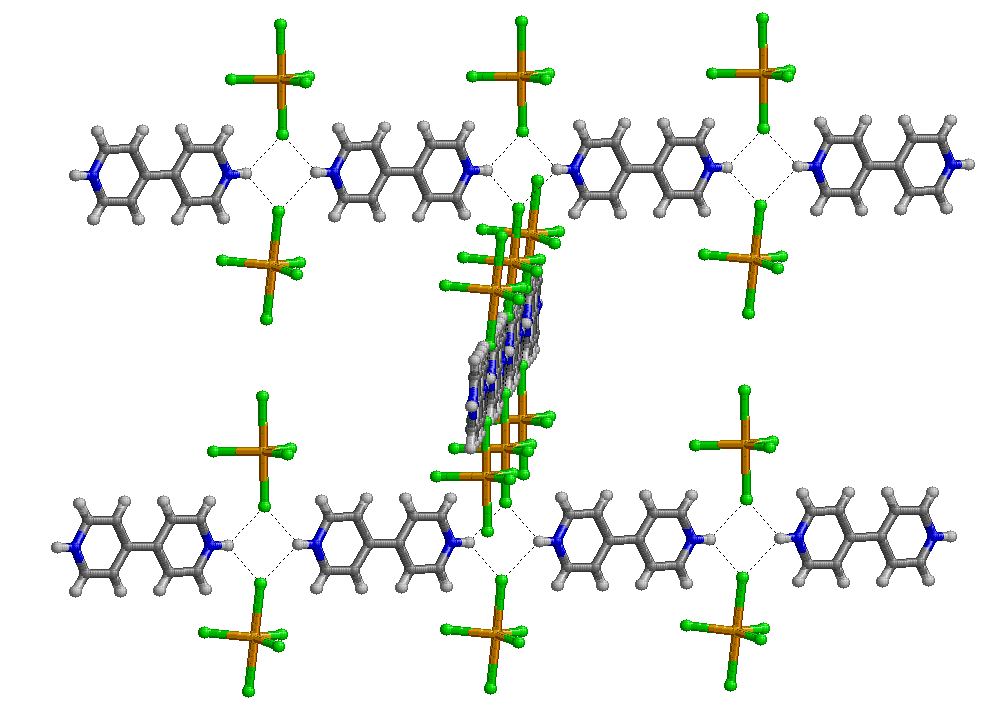


Fig. 3 A view of the hydrogen bonded ribbons present in the crystal structure of [4,4'-H2bipy][FeCl5] 4.


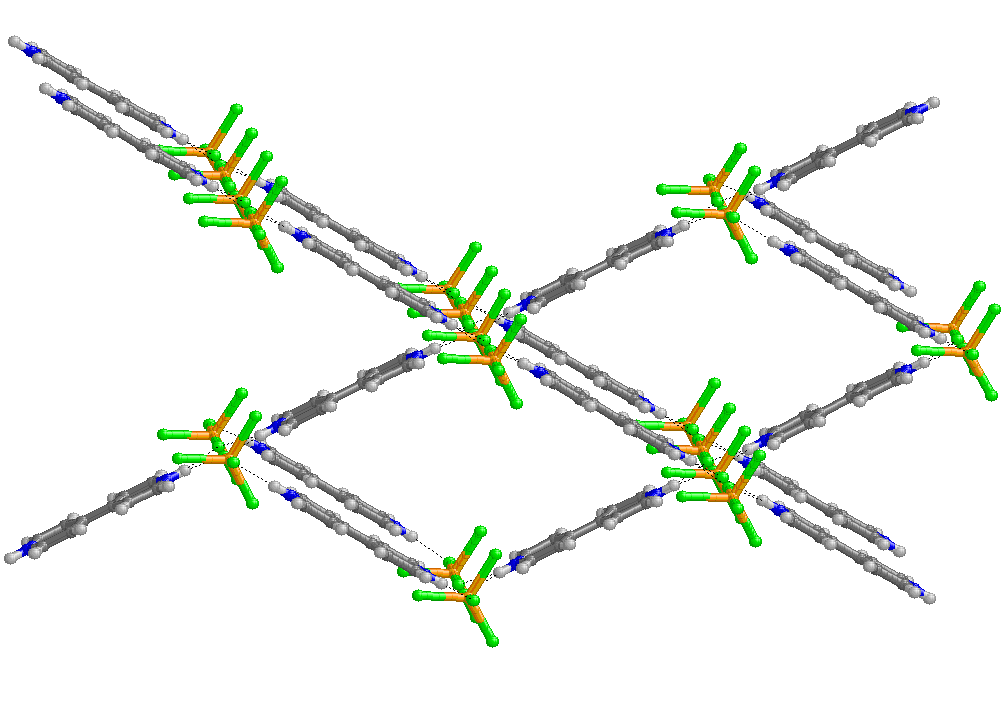


Fig. 4 A second view of the crystal structure of [4,4'-H2bipy][FeCl5] 4.
