# Supplementary material for: Homologous families of chloride-rich 4,4′-bipyridinium salt structures
Source: Royal Society of Chemistry journal article supplement (doi:10.1039/b009467f), 2001-01-01
Supplement: b009467f2.doc [file b009467f2.doc]

**Crystal refinement details**

In **1** the cations lie along a C2 axis (through the nitrogen atoms). In **2** and **3** the metal atoms lie at sites of C2h symmetry and the anions at sites of D2 symmetry. In **4** the cations lie on mirror planes and the anions lie at sites of C2 symmetry. The crystal structure of **4** is nearly (all bar the equatorial atoms of the [FeCl5]2- anion) but not actually centrosymmetric (Flack parameter = 0.08(2)) . All hydrogen atoms were located in difference maps and included in idealised positions. X-ray powder diffraction experiments on bulk samples of **1** - **3** were consistent with the presence of pure phases with the structures noted above. Powder patterns of samples of **4** indicated the possibility that a phase change occurs on grinding, which possibility remains to be explored.
